# Supplementary material
Source: PubMed Central journal article supplement (PMC1157041)

# Cardiac Progenitor Cells

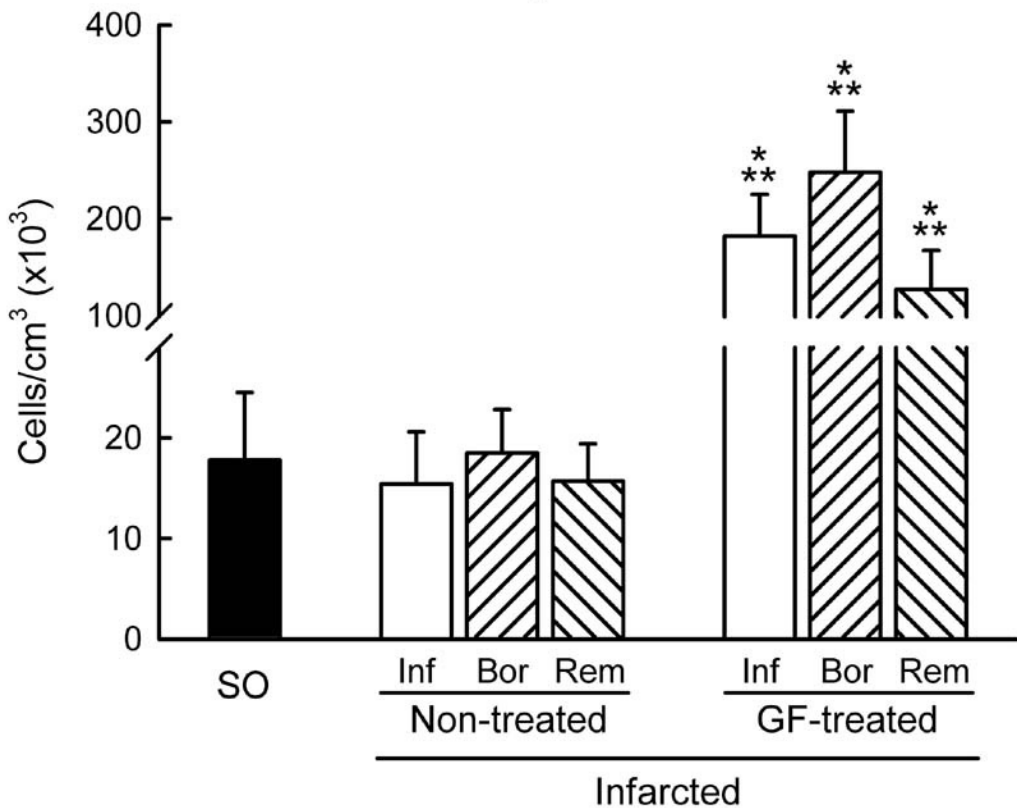

Supplement: pnas_0502678102_10.pdf [file pnas_0502678102_10.pdf]

# Cycling Cardiac Progenitor Cells

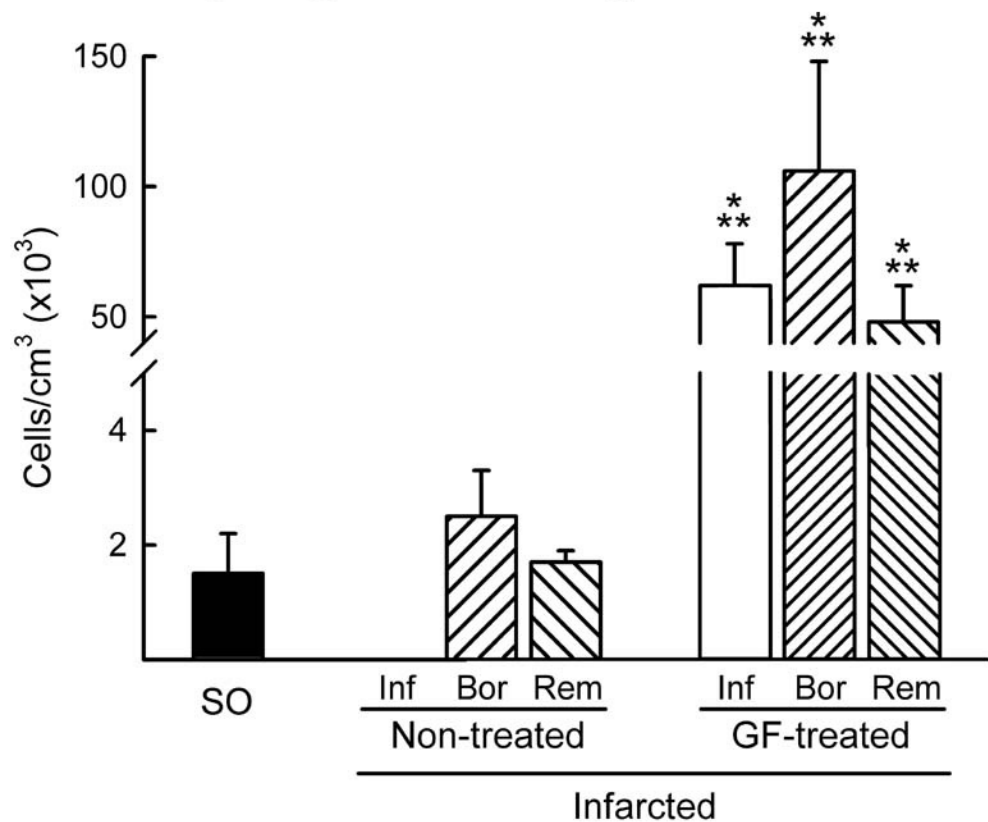

Supplement: pnas_0502678102_11.pdf [file pnas_0502678102_11.pdf]

# Apoptotic Cardiac Progenitor Cells

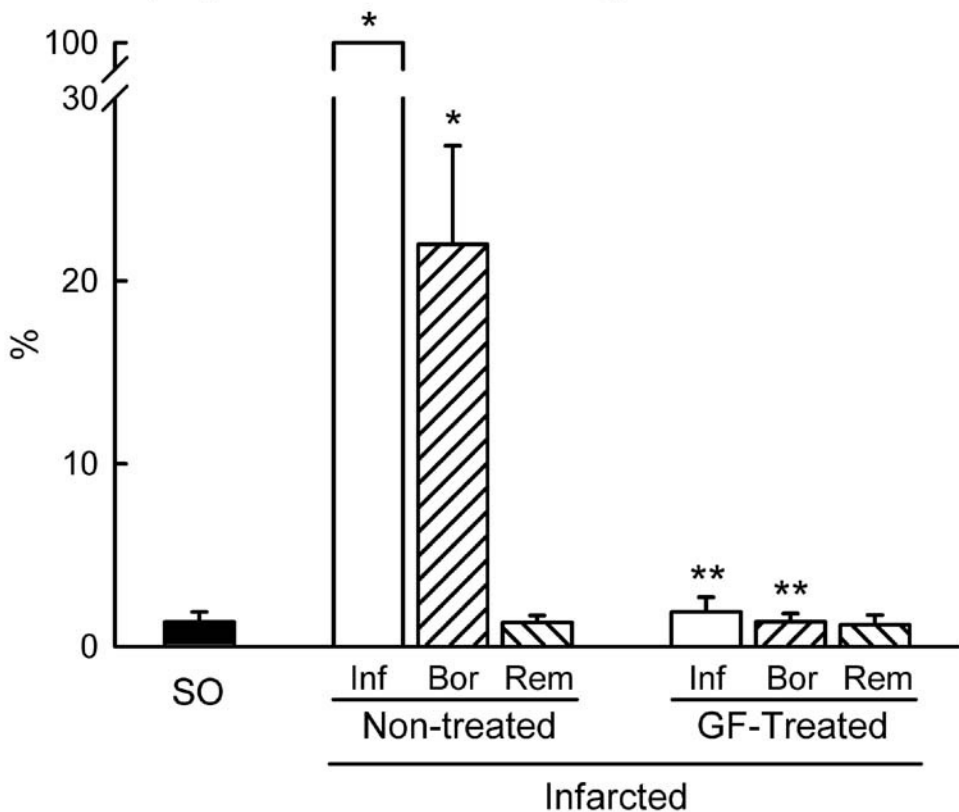

Supplement: pnas_0502678102_12.pdf [file pnas_0502678102_12.pdf]

## Fractional Shortening

## LV Stroke Volume

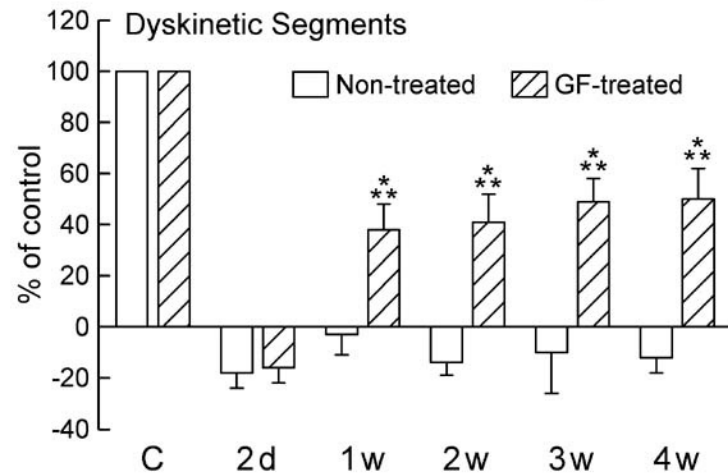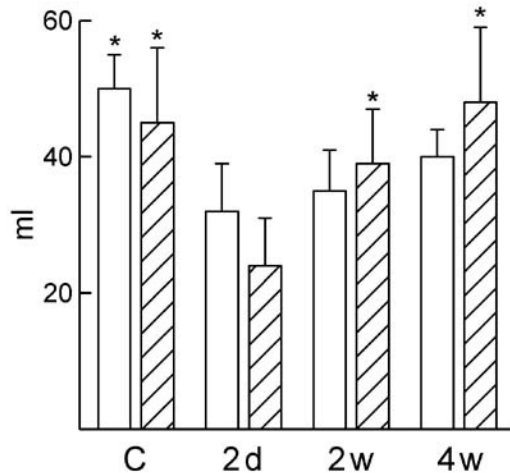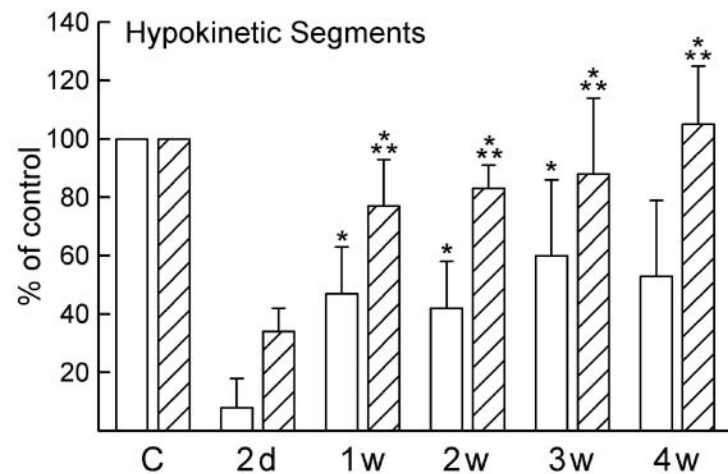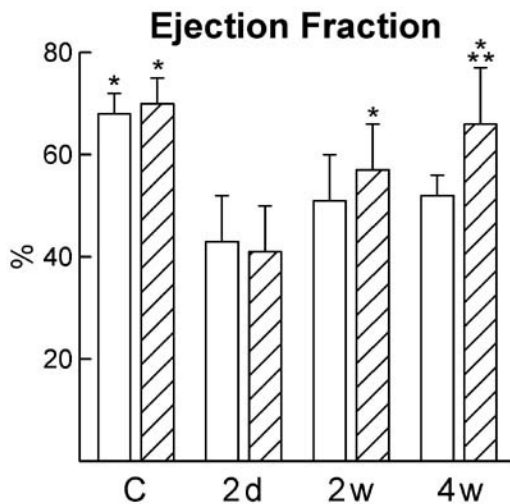

Supplement: pnas_0502678102_13.pdf [file pnas_0502678102_13.pdf]

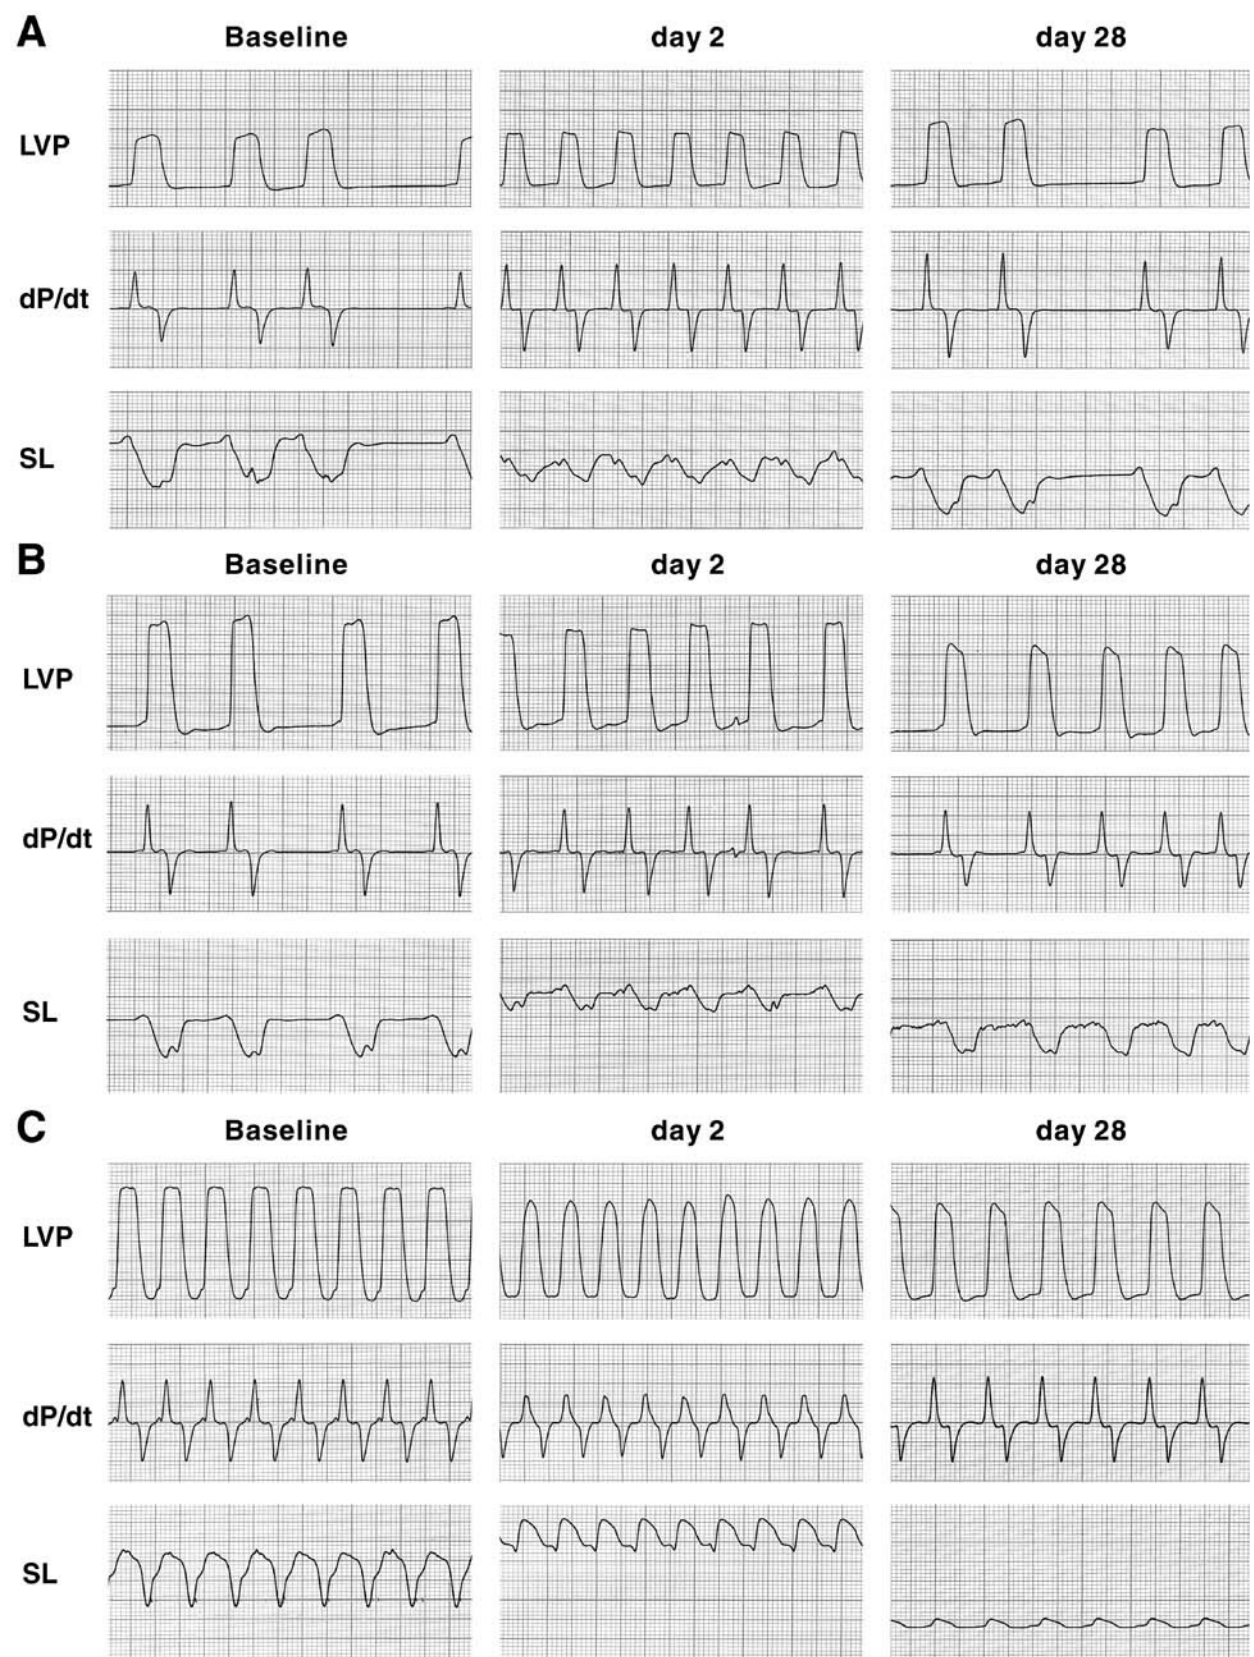

Supplement: pnas_0502678102_14.pdf [file pnas_0502678102_14.pdf]

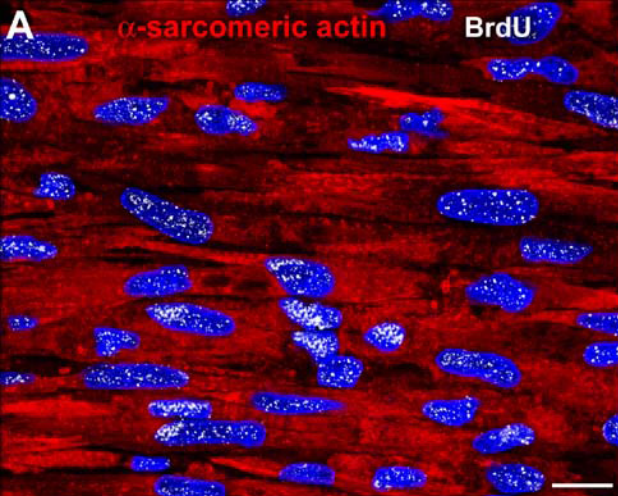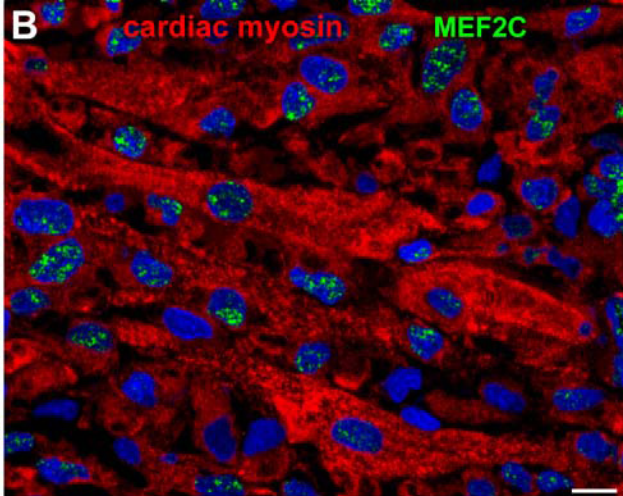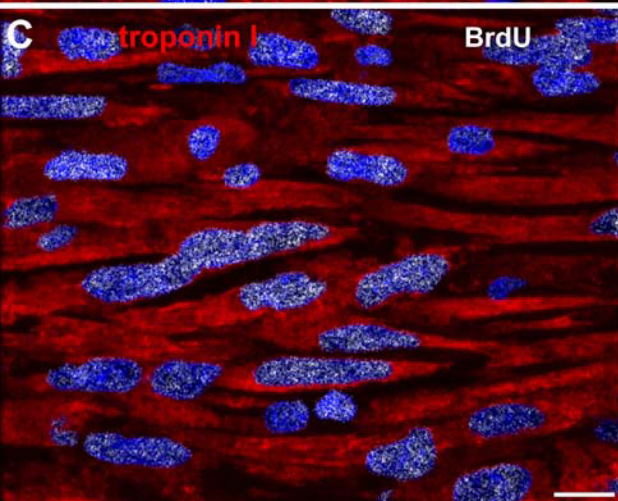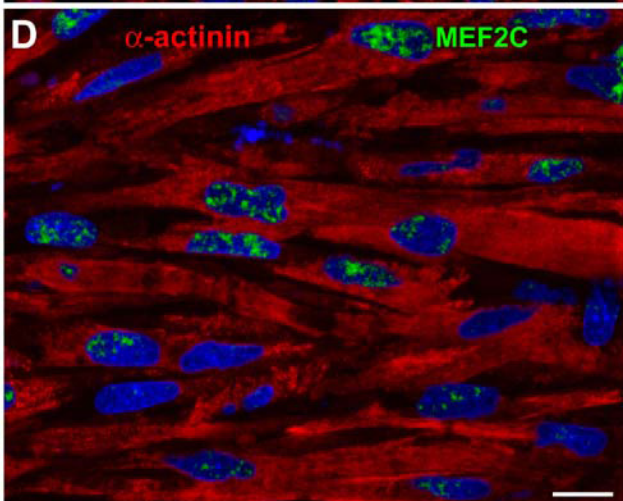

**A - D**

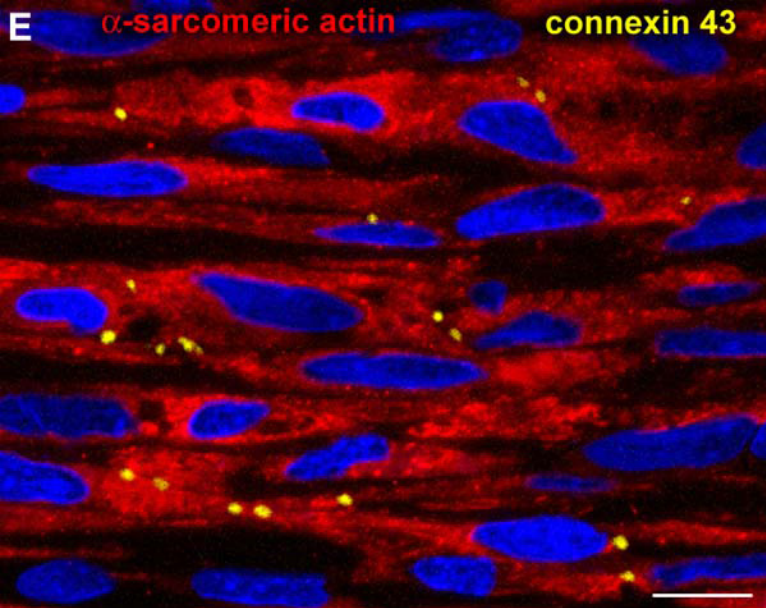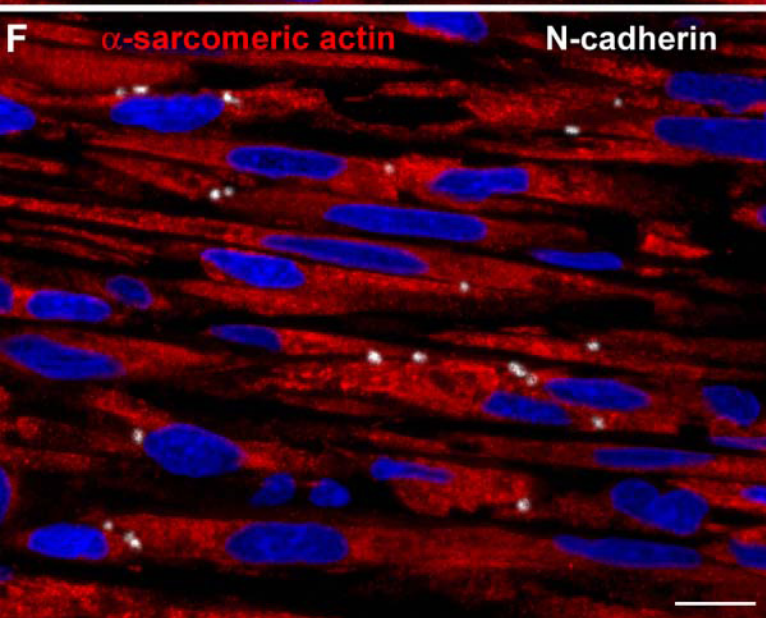

E-F

**G**

# Frequency Distribution of Myocyte Sizes

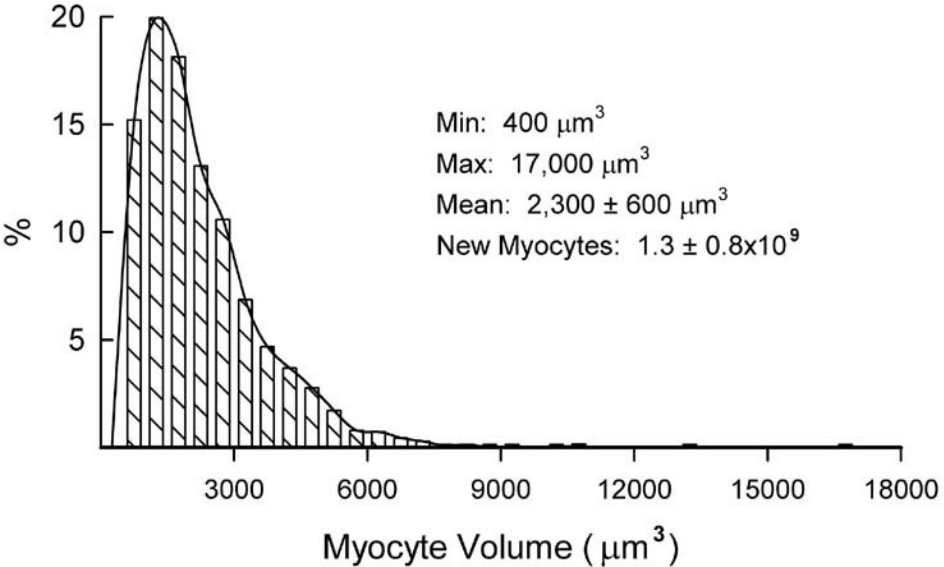**G**

Supplement: pnas_0502678102_15.pdf [file pnas_0502678102_15.pdf]

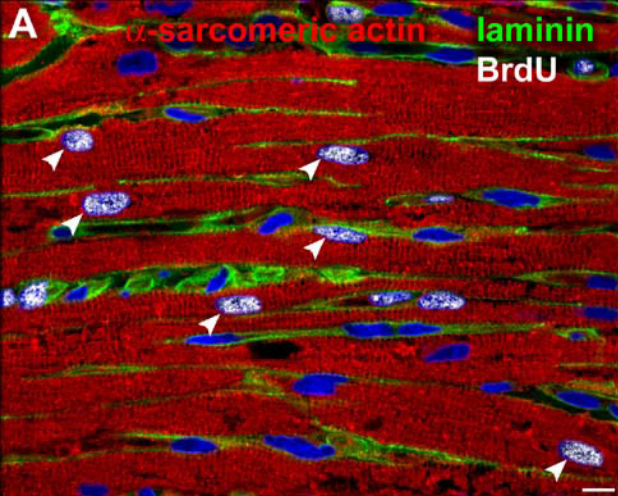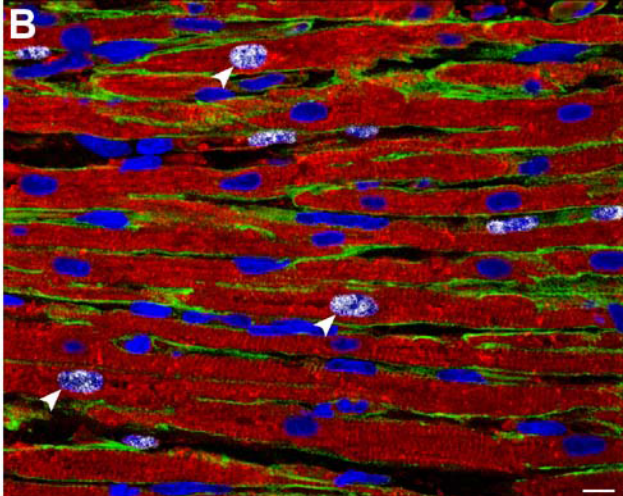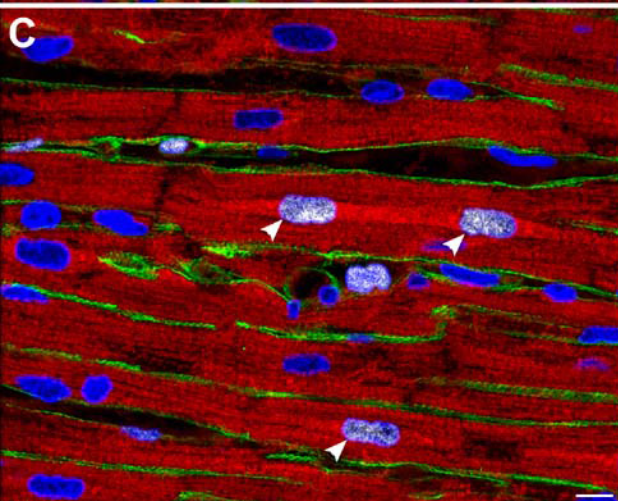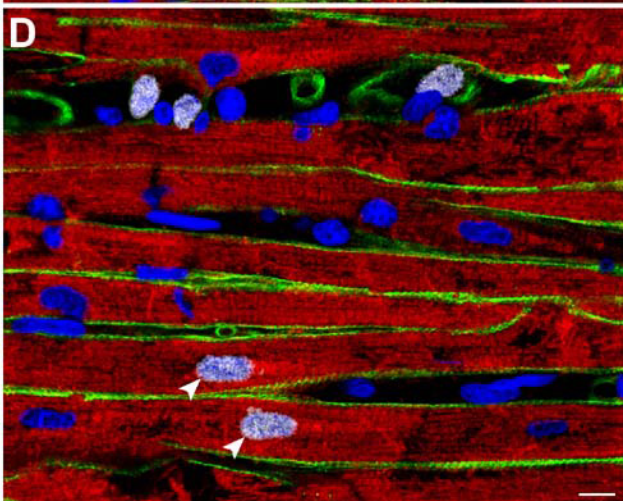

Supplement: pnas_0502678102_16.pdf [file pnas_0502678102_16.pdf]

# BrdU-Labeled Myocytes

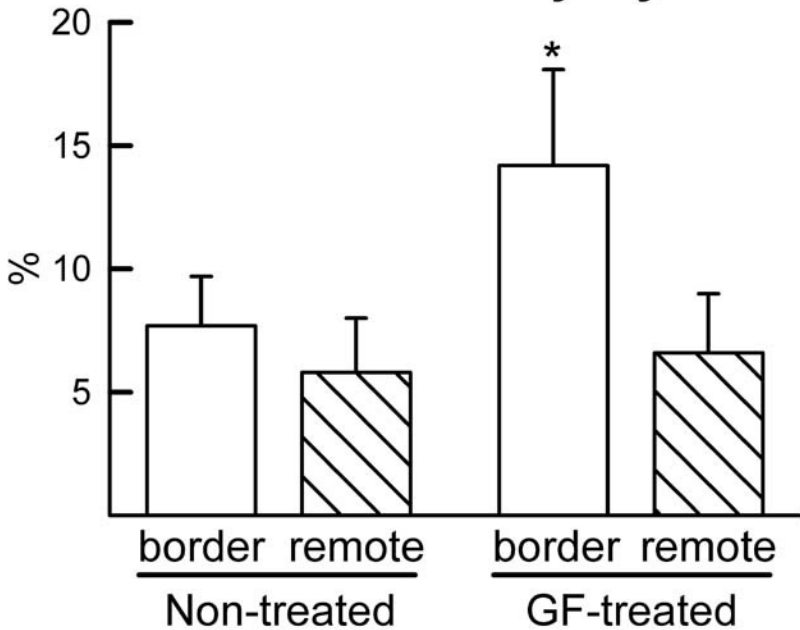

Supplement: pnas_0502678102_17.pdf [file pnas_0502678102_17.pdf]

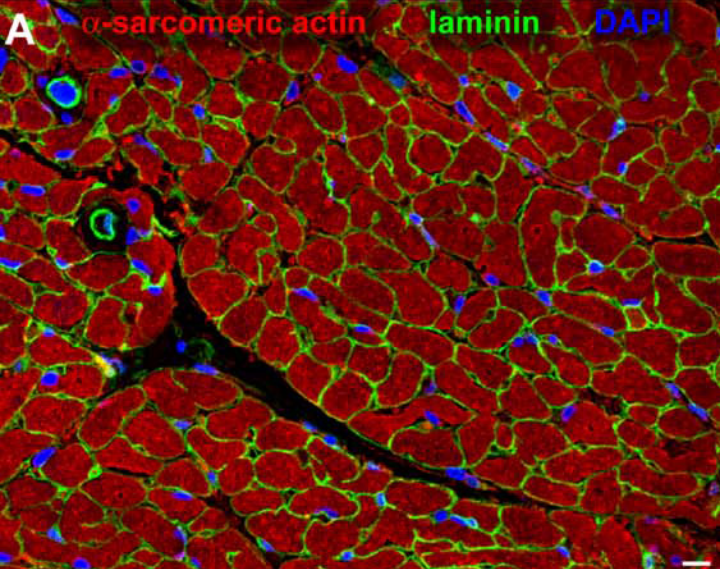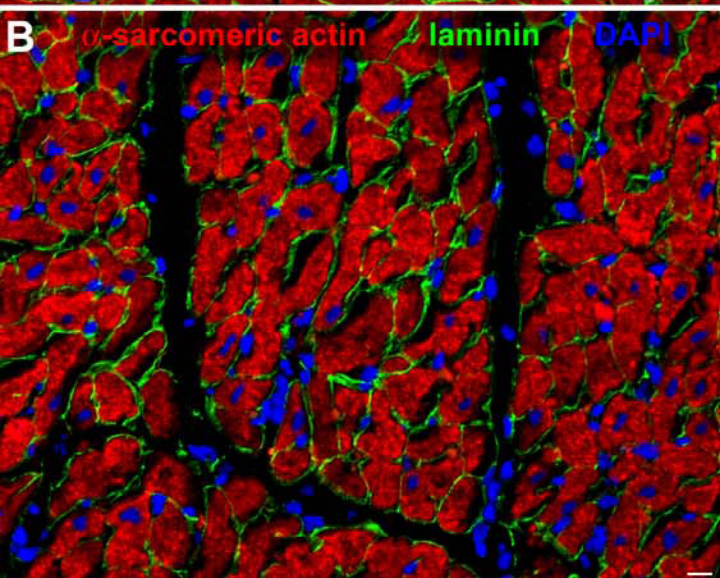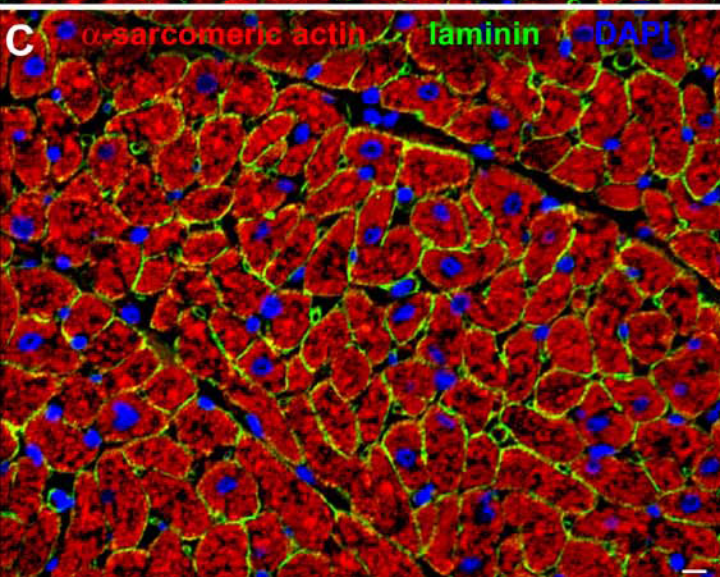

A-C

# D Myocyte Cross-Sectional Area

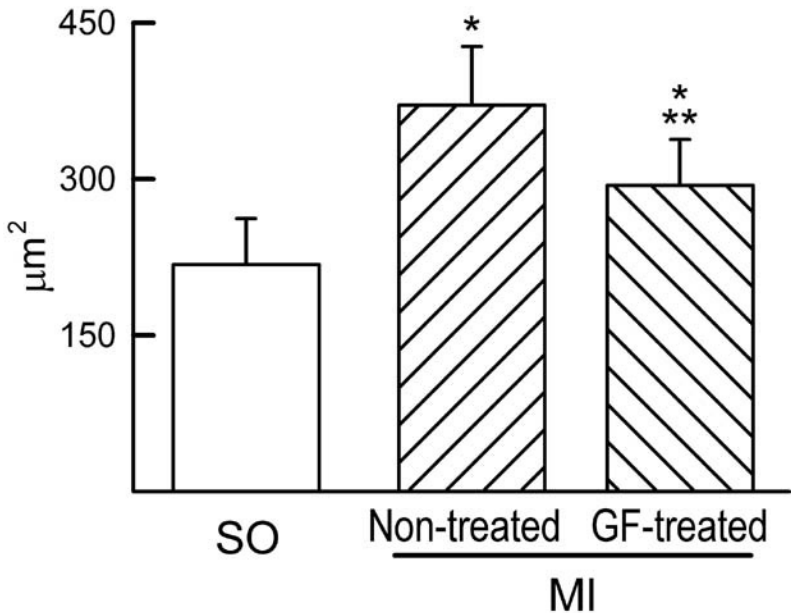

D

Supplement: pnas_0502678102_18.pdf [file pnas_0502678102_18.pdf]

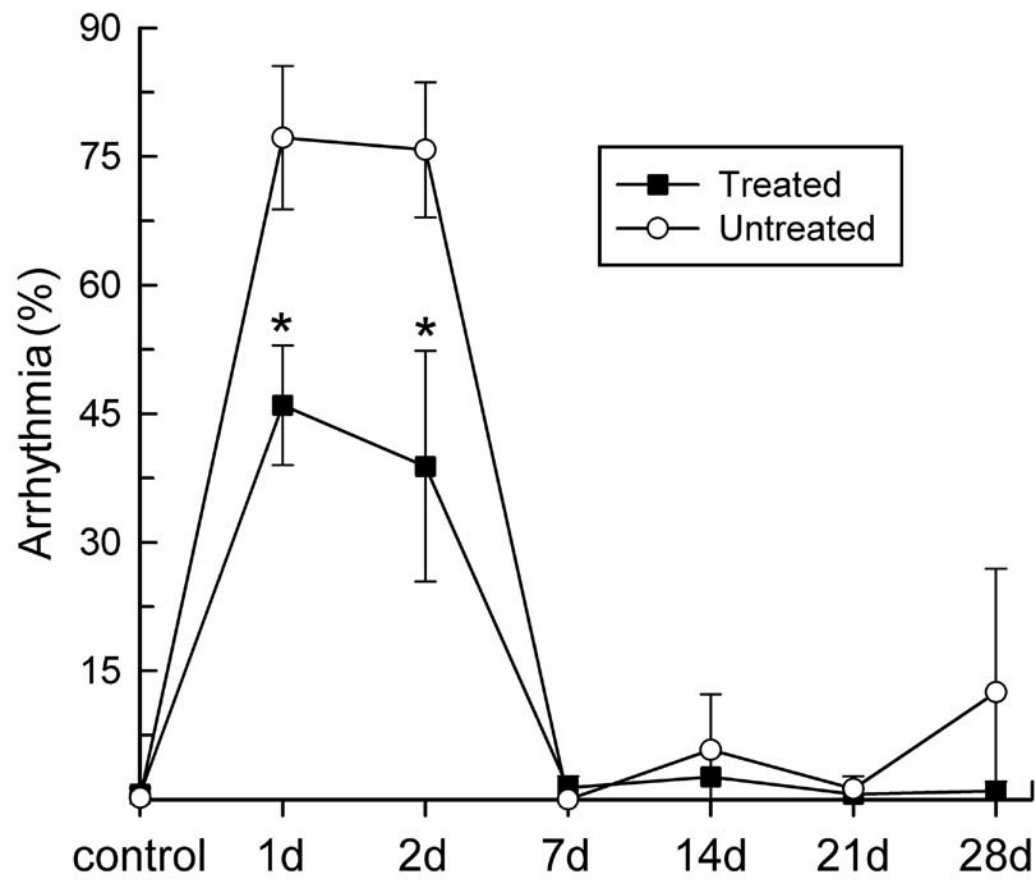

Supplement: pnas_0502678102_19.pdf [file pnas_0502678102_19.pdf]

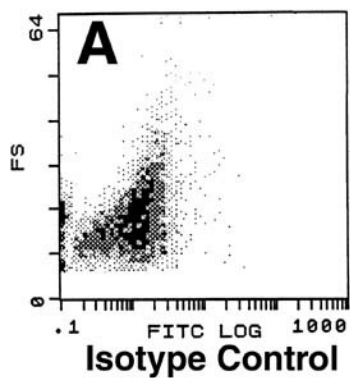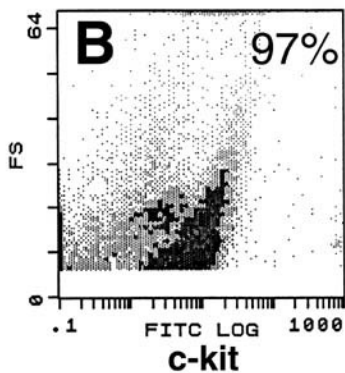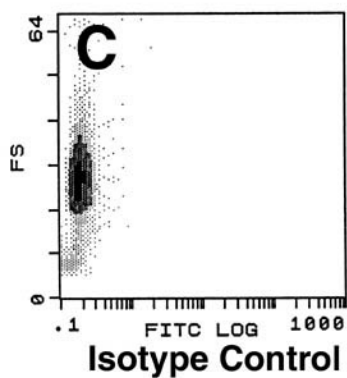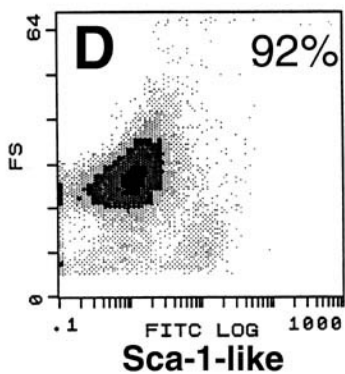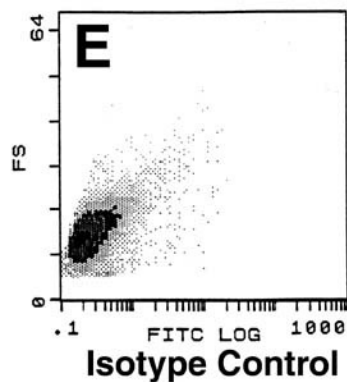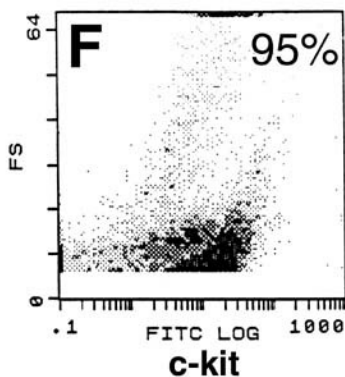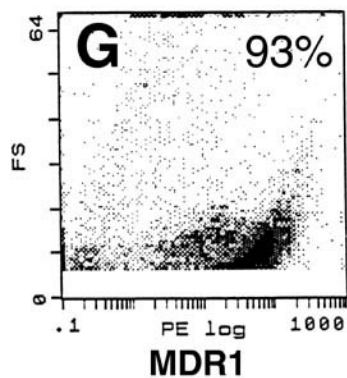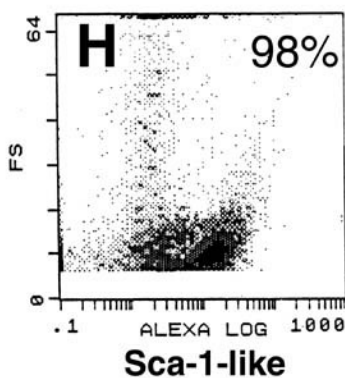

Supplement: pnas_0502678102_2.pdf [file pnas_0502678102_2.pdf]

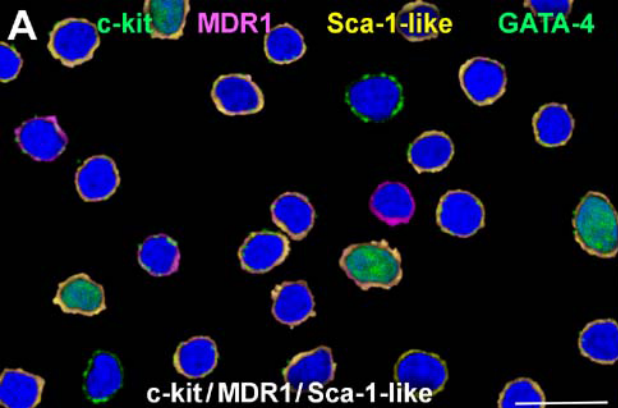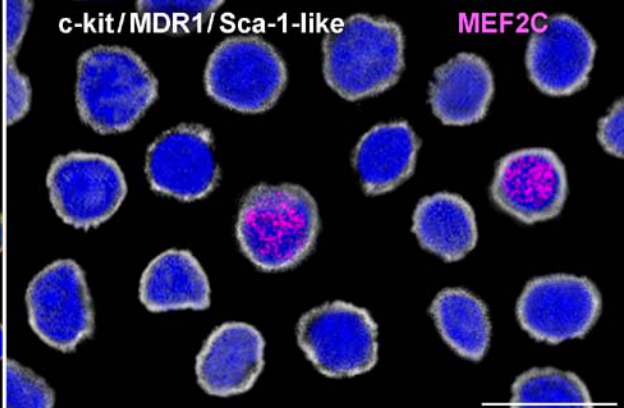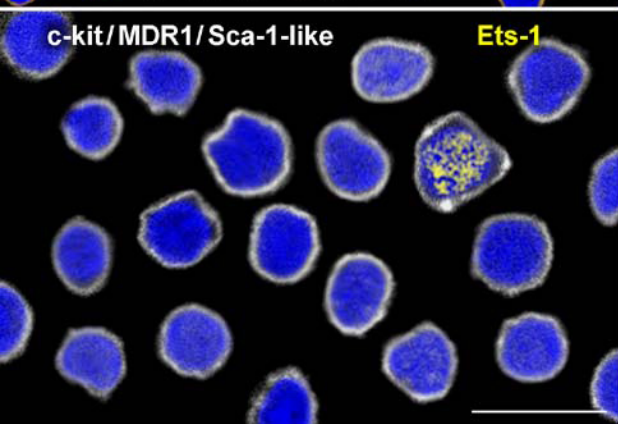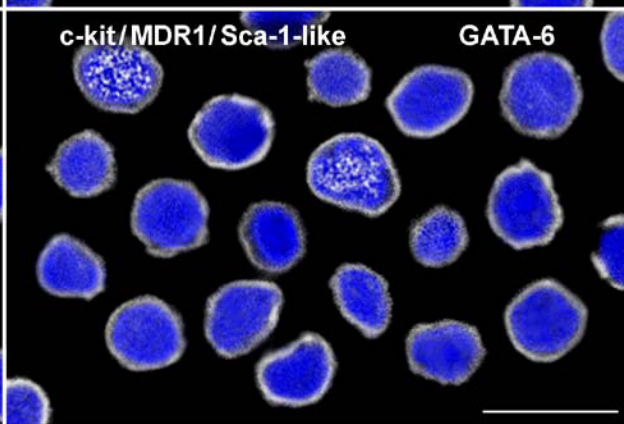

**A**

## B Distribution of Surface Markers in Cardiac Progenitor Cells

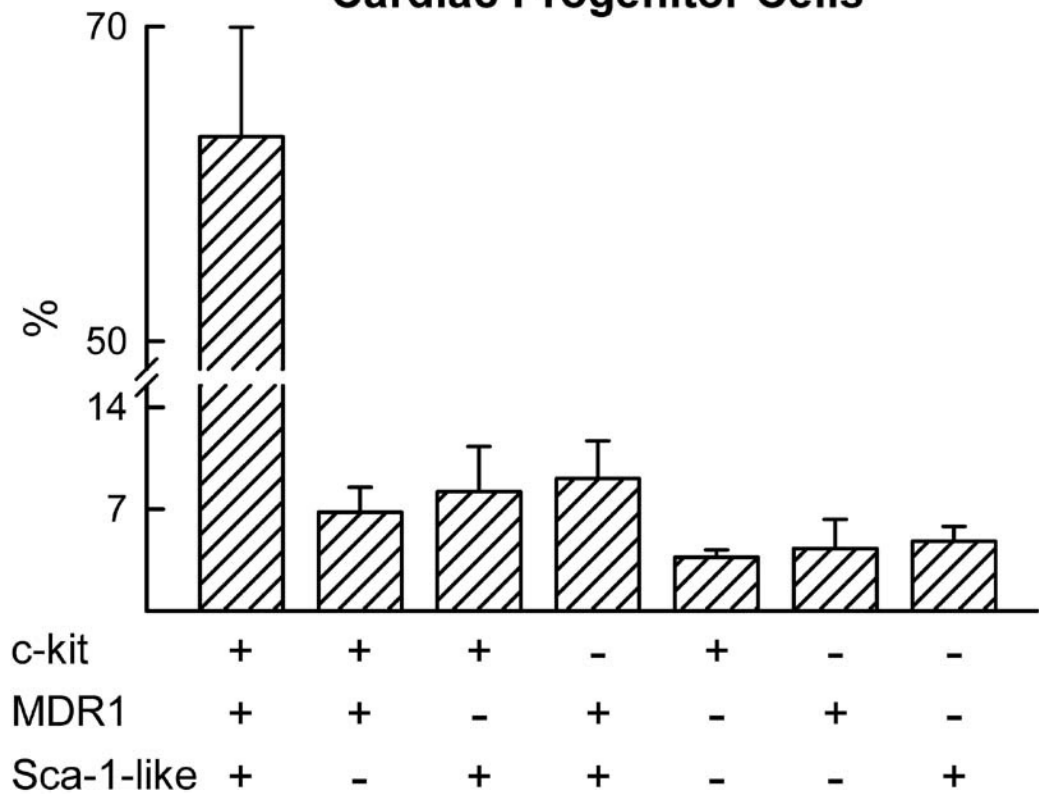

B

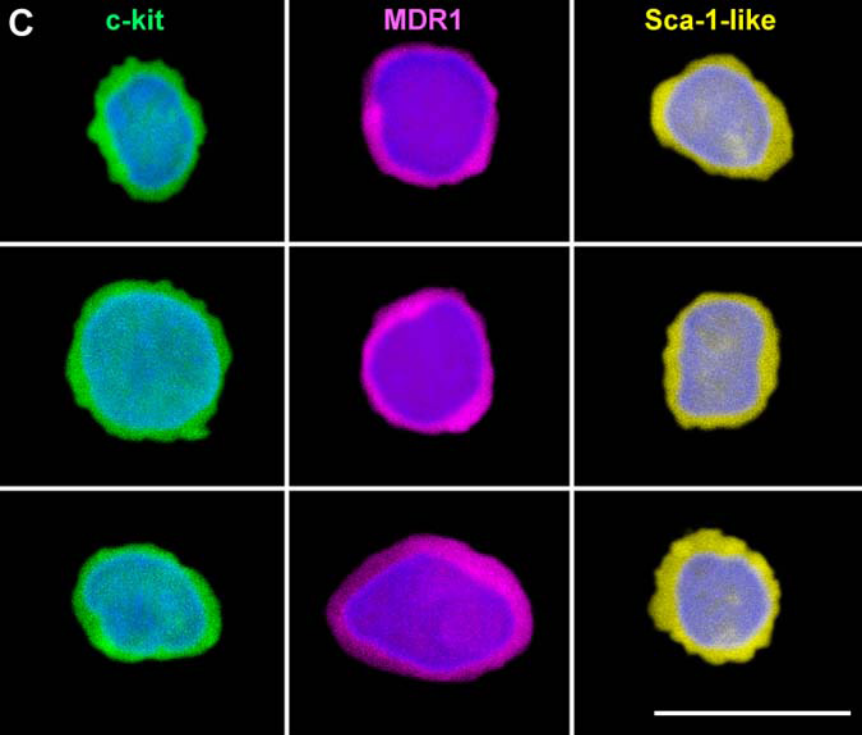

**C**

Supplement: pnas_0502678102_3.pdf [file pnas_0502678102_3.pdf]

c-kit

GATA-4

MEF2C

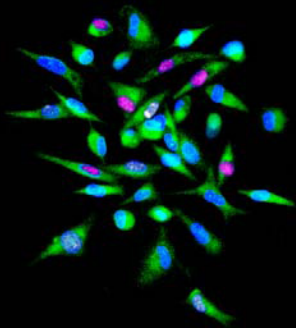

Sca-1-like

MEF2C

Ets-1

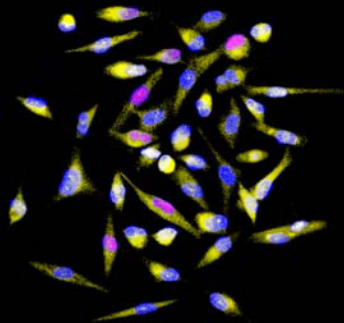

Supplement: pnas_0502678102_4.pdf [file pnas_0502678102_4.pdf]

# Differentiation of CSCs

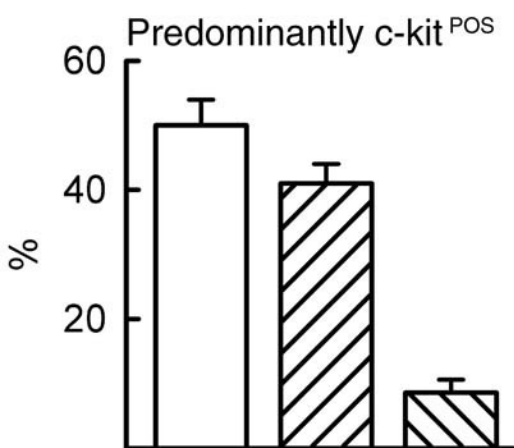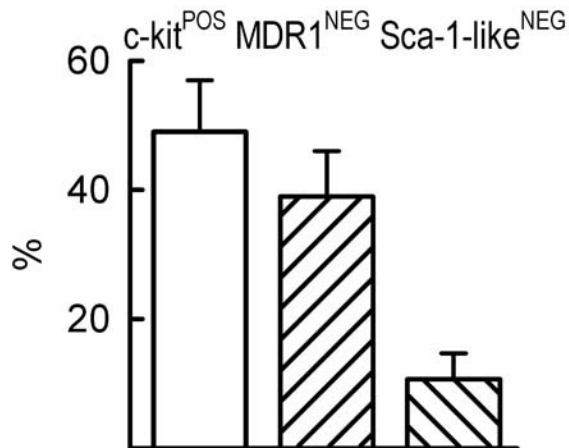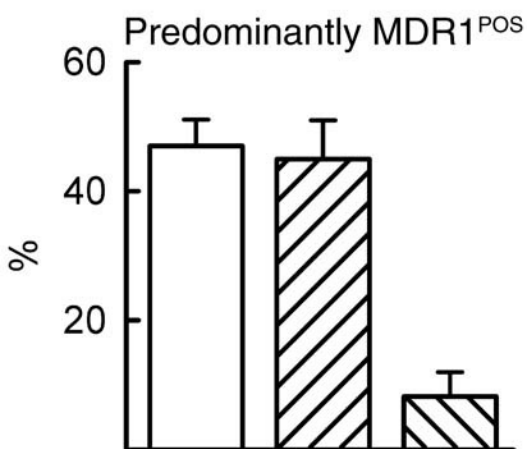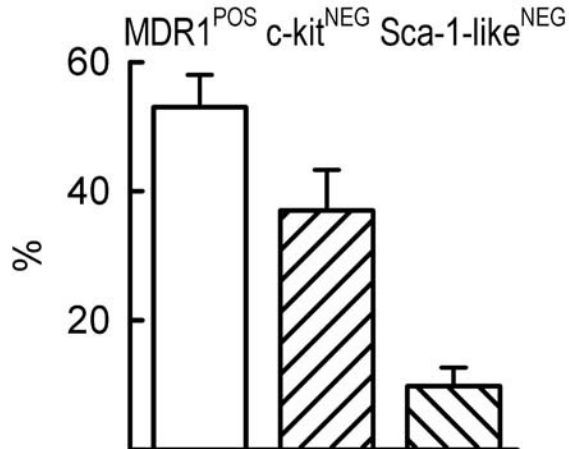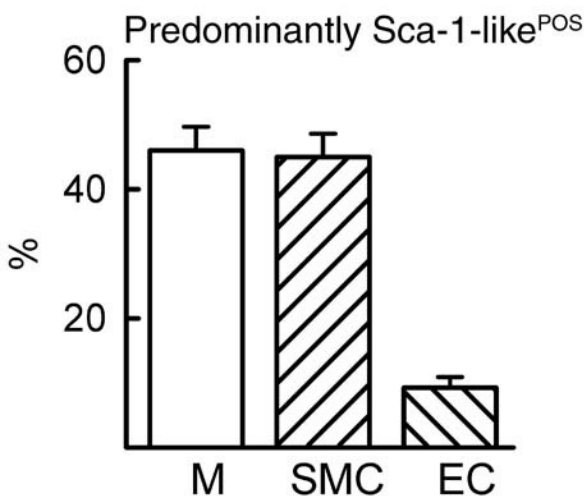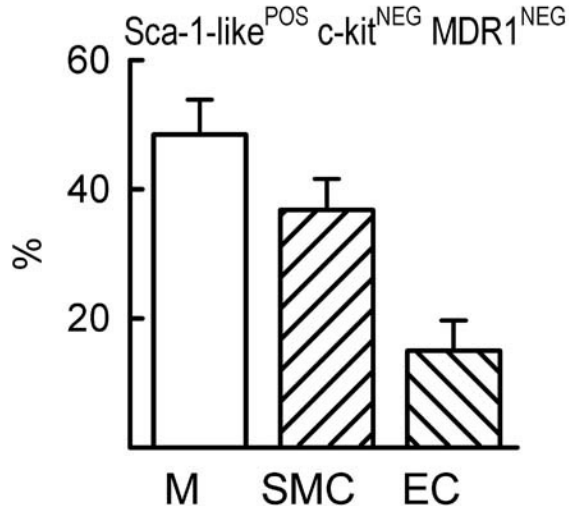

Supplement: pnas_0502678102_5.pdf [file pnas_0502678102_5.pdf]

# Clonal Expansion: Number of Differentiated Cells

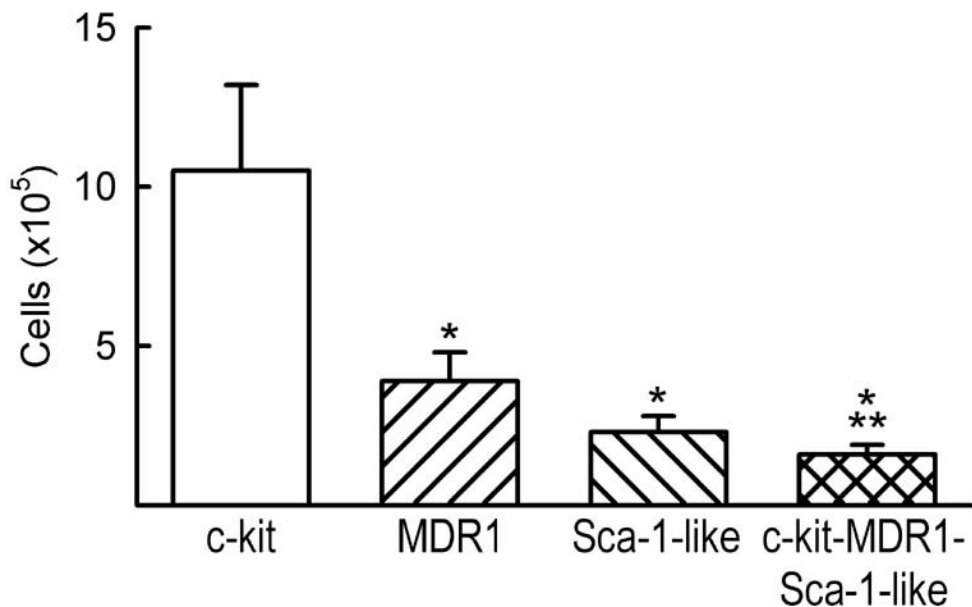

Supplement: pnas_0502678102_6.pdf [file pnas_0502678102_6.pdf]

### Migration Assay

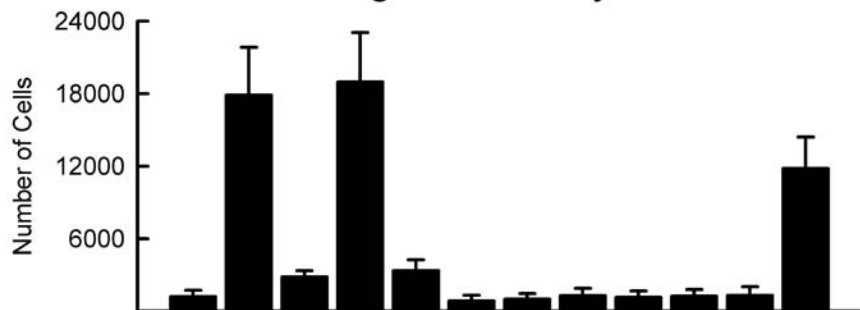

### Invasion Assay

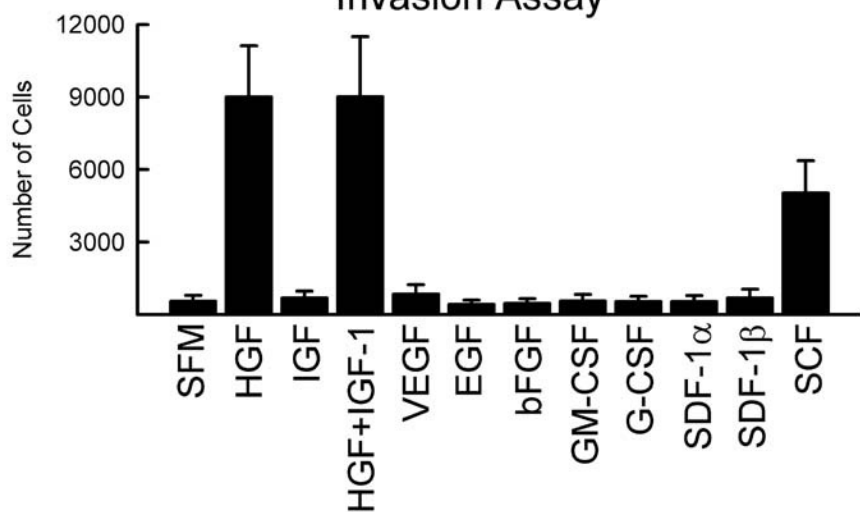

### Invasion Assay

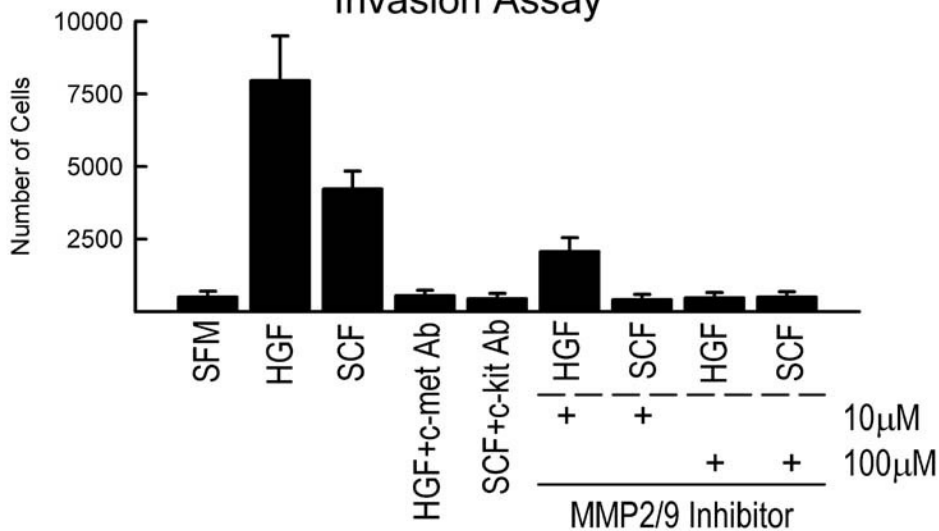

Supplement: pnas_0502678102_7.pdf [file pnas_0502678102_7.pdf]

**A** Apoptosis of Cardiac Progenitors *In Vitro*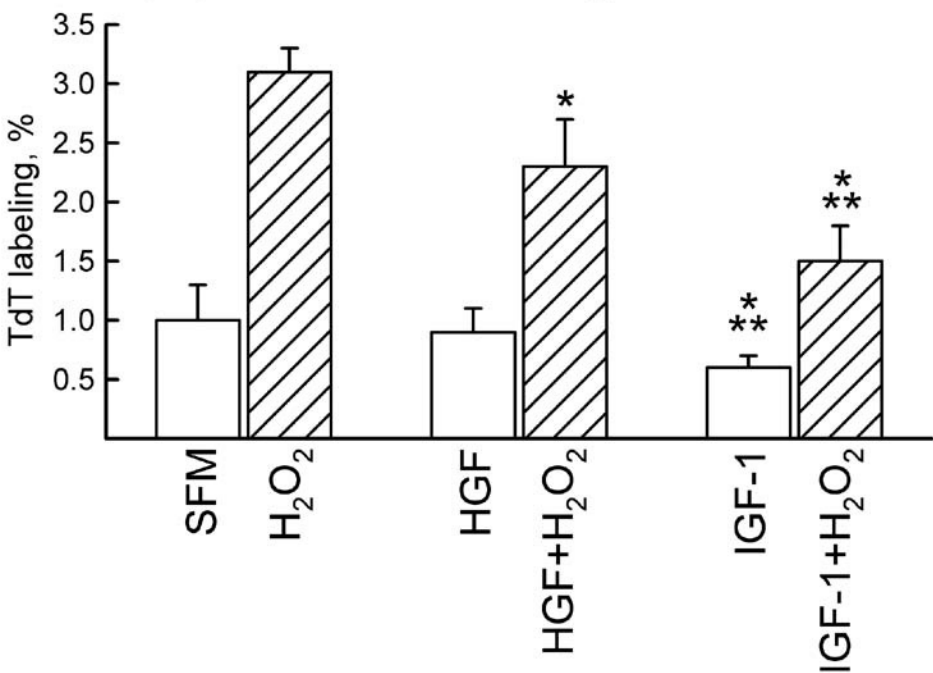**B** Proliferation of Cardiac Progenitors *In Vitro*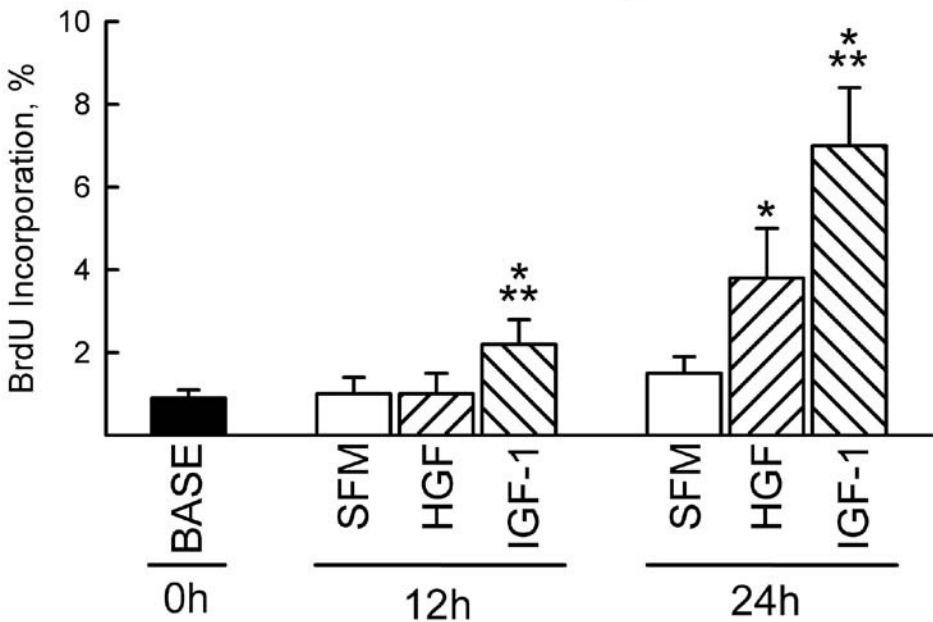

Supplement: pnas_0502678102_8.pdf [file pnas_0502678102_8.pdf]

**A** **Cardiac Progenitors Synthesize HGF and IGF-1**

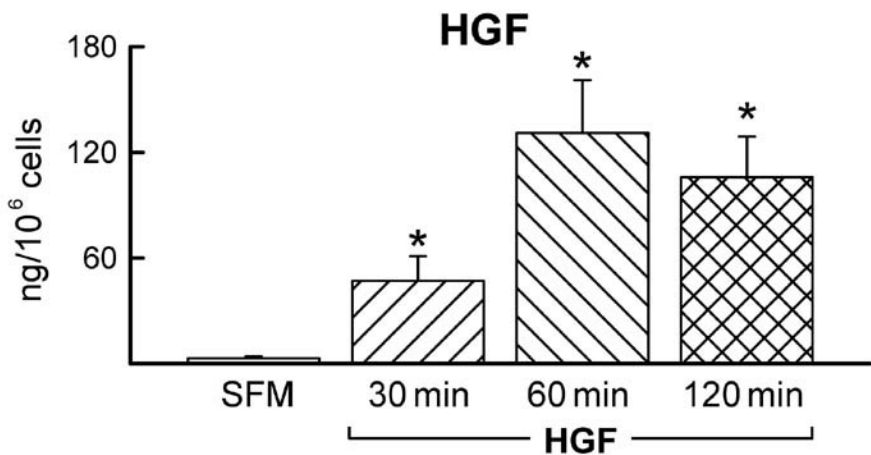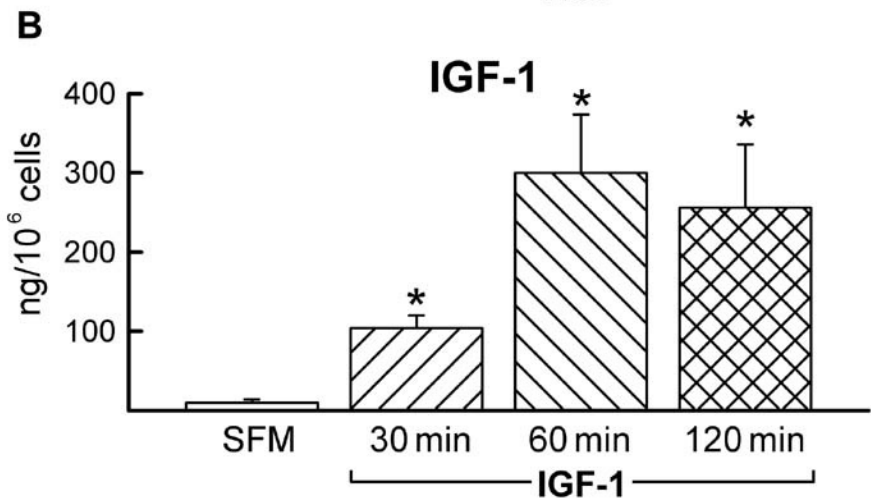

Supplement: pnas_0502678102_9.pdf [file pnas_0502678102_9.pdf]
